# Supplementary material
Source: publisher figshare collection journal article supplement (https://tandf.figshare.com/ndownloader/files/14738519)
Supplement: Supplementary file 1 [file 14738519]

Supporting Information for

**Petrogenesis of late Early Oligocene trachytes in central Qiangtang Block, Tibetan Plateau: crustal melting during lithospheric delamination?**

**Quan Ou1, 2, Qiang Wang2[[1]](#footnote-2)*, 3, 4,** **Chunfu Zhang5, Hai-Xiang Zhang2*, Lu-Lu Hao2, Jin-Hui Yang6, Jian-Qing Lai1, Wei Dan2, Zi-Qi Jiang2,7, Xiao-Ping Xia2**

1 Key Laboratory of Metallogenic Prediction of Nonferrous Metals and Geological Environment Monitoring, Ministry of Education, School of Geosciences and Info-Physics, Central South University, Changsha 410083, China

2 State Key Laboratory of Isotope Geochemistry, Guangzhou Institute of Geochemistry, Chinese Academy of Sciences, Guangzhou 510640, China

3 CAS Center for Excellence in Tibetan Plateau Earth Sciences, Beijing 100101, China

4 University of Chinese Academy of Sciences, Beijing 10069, China

5 Department of Geosciences, Fort Hays State University, KS 67601–4099, USA

6 Institute of Geology and Geophysics, Chinese Academy of Science, Beijing 100029, China

7 School of Earth Science, Guilin University of Technology, Guilin 541004, China

**Corresponding author:**

*Wang Q., Email: wqiang@gig.ac.cn,*

*Zhang H. X., Email: zhanghx@gig.ac.cn*

**Introduction**

The data set contained in the additional supporting information (Figure S1, Tables S1 to S9 and one Supplementary Document), include elements/ isotopes diagram (Figure S1), sample description (Table S1), age data (Table S2-S4), mineral composition data (Table S5-S6), major and trace elements data (Table S7), whole rock Nd-Sr isotopic data (Table S8), zircon Hf-O isotopic data (Table S9), and trace element modeling (Supplementary Document 1).

**Captions for Figure S1**

Figure S1. Plots of (87Sr/86Sr)i, εNd(t), and (Nb/La)PM vs. MgO of the Gemuchaka lavas. The data of K-rich rocks are as in Figure 4 in the main text.

**Captions for Tables S1 to S9**

Table S1. The localitie, coordinates, and mineral constituents of all trachytes from the Gemuchaka area, central Qiangtang Block

Table S2. LA-ICP-MS zircon U–Pb data of the trachytes in the Gemuchaka area, central Qiangtang Block

Table S3. SIMS zircon U–Pb data of the trachytes from the Gemuchaka area, central Qiangtang Block

Table S4. Summary of argon isotopic data and ages for the trachytes from the Gemuchaka area, central Qiangtang Block

Table S5. Representative electron microprobe analyses of mica in the Cenozoic volcanic rocks from the central Qiangtang Block

Table S6. Representative electron microprobe analyses of feldspars of trachytes from the Gemuchaka area, central Qiangtang Block

Table S7. Major (wt. %) and trace (ppm) elements for the trachytes from the Gemuchaka area, central Qiangtang Block

Table S8. Sr–Nd isotopic compositions for the trachytes and other K-rich volcanic rocks from the Gemuchaka area, central Qiangtang block

Table S9. Zircon Hf-O isotopic data for the trachytes from the Gemuchaka area, central Qiangtang BlockSr–Nd isotopic compositions for the trachytes and other K-rich volcanic rocks from the Gemuchaka area, central Qiangtang block

**Caption for Supplementary Document**

Supplementary Document 1: trace element modeling

Non-modal batch melting model: La/Yb vs. La (ppm)

**Figure S1.** Plots of (87Sr/86Sr)i, εNd(t), and (Nb/La)PM vs. MgO of the Gemuchaka lavas. The data of K-rich rocks are as in Figure 4 in the main text.


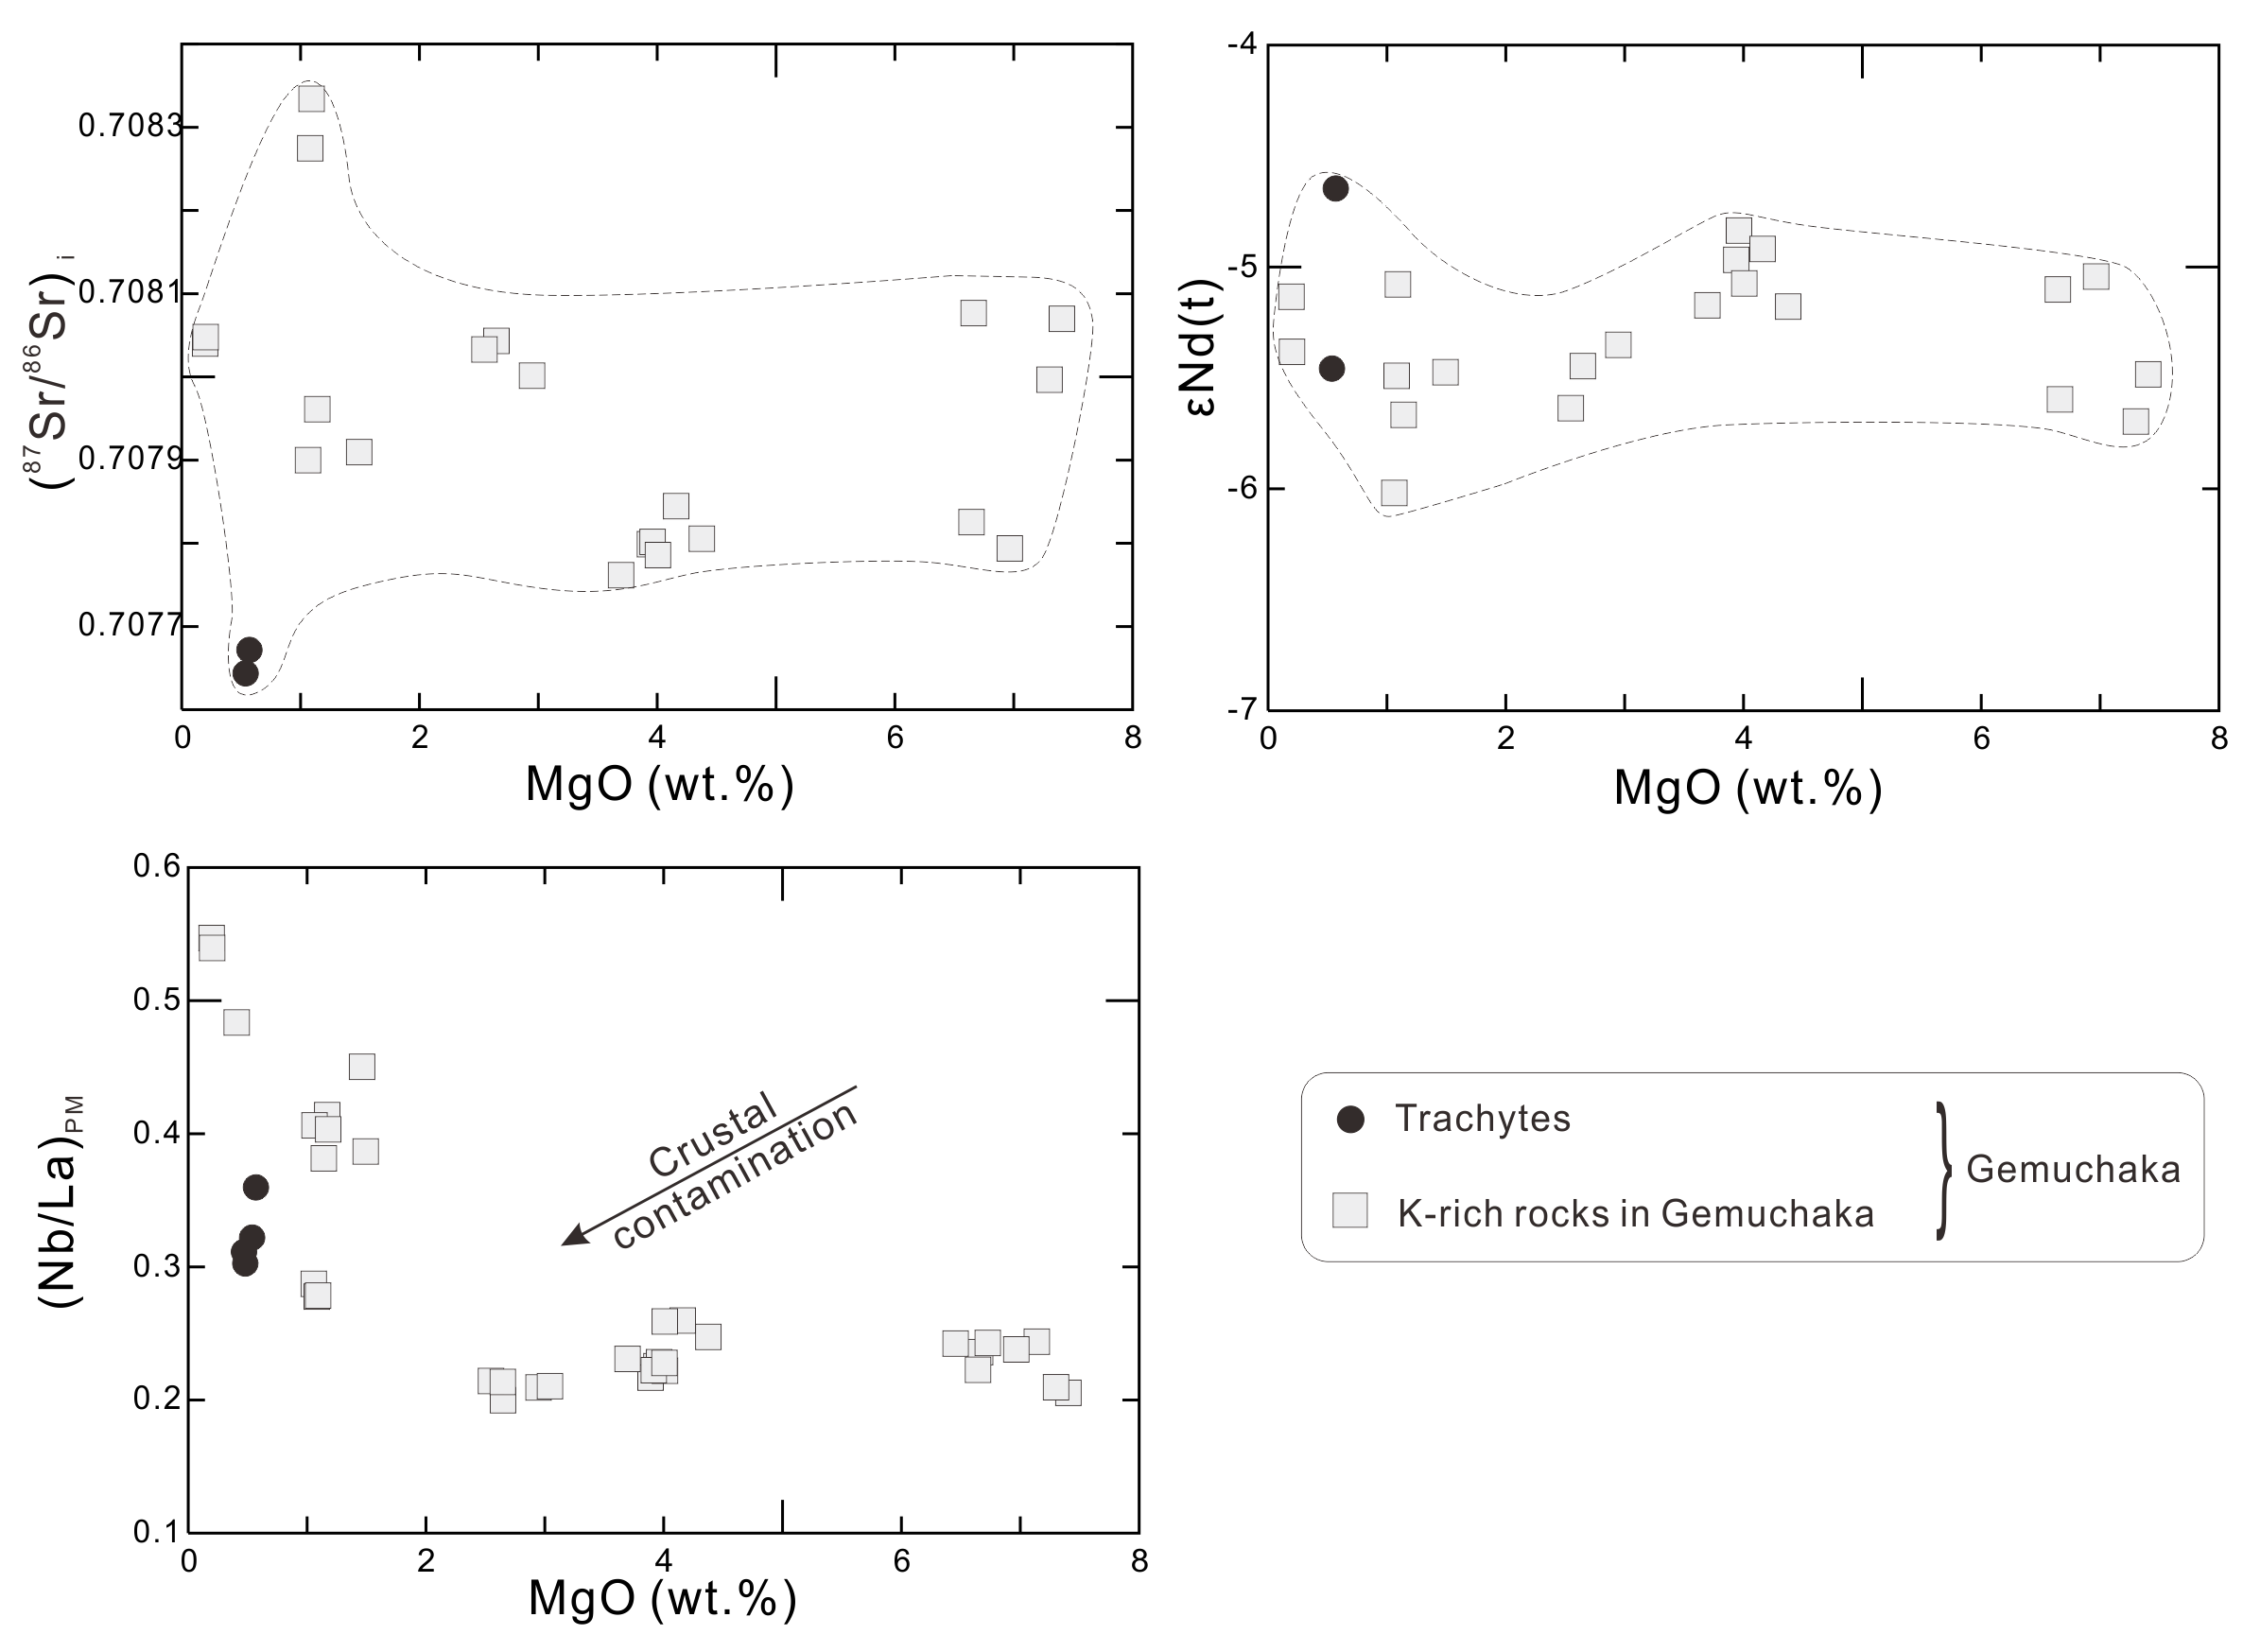


**Table S1.** The localitie, coordinates, and mineral constituents of all trachytes from the Gemuchaka area, central Qiangtang Block

| Sample | Location Number | K2O/Na2O | longitude | latitude | Rock type | Texture | Phenocrysts[1] | Groundmass[1] |
| --- | --- | --- | --- | --- | --- | --- | --- | --- |
| 13ZB44-1 | *LN 3* | 1.3 | E85°37′50″ | N33°54′03″ | trachyte | porphyritic | Pl+Sa | Pl+Sa+Ti-Mt+Glass |
| 13ZB44-2 | *LN 3* | 1.3 | E85°37′50″ | N33°54′03″ | trachyte | porphyritic | Pl+Sa+Bt | Pl+Sa+Bt+Ti-Mt+Glass |
| 13ZB44-3 | *LN 3* | 1.3 | E85°37′50″ | N33°54′03″ | trachyte | porphyritic | Pl+Sa | Pl+Sa+Ti-Mt+Glass |
| 13ZB44-4 | *LN 3* | 1.3 | E85°37′50″ | N33°54′03″ | trachyte | porphyritic | Pl+Sa+Bt | Pl+Sa+Bt+Ti-Mt+Glass |

Note: LN3 are the monadnock numbers shown in Figure 1b. [1] Bt = biotite (Phlogopite-annite series), Sa = sanidine, Pl = plagioclase, Ti-Mt = Ti-Magnetite.

**Table S2.** LA-ICP-MS zircon U–Pb data of the trachytes in the Gemuchaka area, central Qiangtang Block

| Sample spot | Th (ppm) | U (ppm) | Th/U | 207Pb/206Pb | | 207Pb/235U | | 206Pb/238U | | 207Pb/206Pb (Ma) | | 207Pb/235U (Ma) | | 206Pb/238U (Ma) | |
| --- | --- | --- | --- | --- | --- | --- | --- | --- | --- | --- | --- | --- | --- | --- | --- |
| Ratio | 1σ | Ratio | 1σ | Ratio | 1σ | Age | 1σ | Age | 1σ | Age | 1σ |
| 13ZB44-1 |  |  |  |  |  |  |  |  |  |  |  |  |  |  |  |
| 13ZB44-1 01 | 699 | 718 | 0.97 | 0.05478 | 0.00367 | 0.03396 | 0.00210 | 0.00467 | 0.00009 | 403 | 103 | 34 | 2 | 30 | 0.6 |
| 13ZB44-1 02 | 62 | 48 | 1.28 | 0.10974 | 0.00292 | 4.16060 | 0.10882 | 0.27454 | 0.00356 | 1795 | 29 | 1666 | 21 | 1564 | 18 |
| 13ZB44-1 03 | 160 | 127 | 1.25 | 0.09327 | 0.02443 | 0.05543 | 0.01421 | 0.00431 | 0.00023 | 1493 | 577 | 55 | 14 | 28 | 1 |
| 13ZB44-1 04 | 2371 | 4878 | 0.49 | 0.04736 | 0.00113 | 0.03047 | 0.00072 | 0.00466 | 0.00005 | 67 | 37 | 30.5 | 0.7 | 30 | 0.3 |
| 13ZB44-1 05 | 215 | 167 | 1.29 | 0.07359 | 0.01939 | 0.04519 | 0.01170 | 0.00445 | 0.00022 | 1030 | 564 | 45 | 11 | 29 | 1 |
| 13ZB44-1 06 | 2559 | 1480 | 1.73 | 0.04606 | 0.00233 | 0.02807 | 0.00137 | 0.00442 | 0.00006 | 1 | 109 | 28 | 1 | 28.4 | 0.4 |
| 13ZB44-1 07 | 2989 | 1450 | 2.06 | 0.05066 | 0.00912 | 0.03063 | 0.00548 | 0.00438 | 0.00009 | 226 | 344 | 31 | 5 | 28.2 | 0.6 |
| 13ZB44-1 08 | 69 | 161 | 0.43 | 0.08927 | 0.00380 | 1.92934 | 0.06217 | 0.15978 | 0.00254 | 1410 | 38 | 1091 | 22 | 956 | 14 |
| 13ZB44-1 09 | 146 | 141 | 1.04 | 0.04605 | 0.01130 | 0.02582 | 0.00622 | 0.00407 | 0.00019 |  | 401 | 26 | 6 | 26 | 1 |
| 13ZB44-1 10 | 527 | 880 | 0.6 | 0.05271 | 0.00139 | 0.22485 | 0.00565 | 0.03090 | 0.00029 | 316 | 40 | 206 | 5 | 196 | 2 |
| 13ZB44-1 11 | 220 | 350 | 0.63 | 0.07488 | 0.00125 | 1.75750 | 0.03037 | 0.16934 | 0.00161 | 1065 | 20 | 1030 | 11 | 1008 | 9 |
| 13ZB44-1 12 | 476 | 617 | 0.77 | 0.06060 | 0.00538 | 0.03721 | 0.00286 | 0.00468 | 0.00016 | 625 | 107 | 37 | 3 | 30 | 1 |
| 13ZB44-1 13 | 414 | 712 | 0.58 | 0.04605 | 0.00131 | 0.02845 | 0.00065 | 0.00448 | 0.00008 |  | 58 | 28.5 | 0.6 | 28.8 | 0.5 |
| 13ZB44-1 14 | 220 | 273 | 0.81 | 0.04606 | 0.01000 | 0.02914 | 0.00621 | 0.00459 | 0.00019 | 1 | 360 | 29 | 6 | 30 | 1 |
| 13ZB44-1 15 | 810 | 803 | 1.01 | 0.05879 | 0.00361 | 0.03726 | 0.00219 | 0.00467 | 0.00011 | 559 | 89 | 37 | 2 | 30 | 0.7 |
| 13ZB44-1 16 | 554 | 615 | 0.9 | 0.04605 | 0.00443 | 0.02898 | 0.00268 | 0.00456 | 0.00012 |  | 201 | 29 | 3 | 29.4 | 0.8 |
| 13ZB44-1 17 | 806 | 884 | 0.91 | 0.06334 | 0.00371 | 0.03940 | 0.00207 | 0.00467 | 0.00010 | 720 | 75 | 39 | 2 | 30 | 0.7 |
| 13ZB44-1 18 | 827 | 836 | 0.99 | 0.05343 | 0.00386 | 0.03323 | 0.00203 | 0.00467 | 0.00012 | 347 | 90 | 33 | 2 | 30 | 0.8 |
| 13ZB44-1 19 | 722 | 988 | 0.73 | 0.04606 | 0.00476 | 0.02824 | 0.00286 | 0.00445 | 0.00010 |  | 212 | 28 | 3 | 28.6 | 0.6 |
| 13ZB44-1 20 | 1278 | 1987 | 0.64 | 0.04947 | 0.00519 | 0.03030 | 0.00312 | 0.00444 | 0.00009 | 170 | 235 | 30 | 3 | 28.6 | 0.6 |
| 13ZB44-1 21 | 176 | 191 | 0.92 | 0.04605 | 0.00464 | 0.02827 | 0.00270 | 0.00445 | 0.00014 |  | 209 | 28 | 3 | 28.6 | 0.9 |

**Table S3.** SIMS zircon U–Pb data of the trachytes from the Gemuchaka area, central Qiangtang Block

| sample spots | Th (ppm) | U (ppm) | Th/U | 207Pb/206Pb | | 207Pb/235U | | 206Pb/238U | | 207Pb/206Pb (Ma) | | 207Pb/235U (Ma) | | 206Pb/238U (Ma) | |
| --- | --- | --- | --- | --- | --- | --- | --- | --- | --- | --- | --- | --- | --- | --- | --- |
| Ratio | 1σ (%) | Ratio | 1σ (%) | Ratio | 1σ(%) | Age | 1σ | Age | 1σ | Age | 1σ |
| 13ZB44-1 |  |  |  |  |  |  |  |  |  |  |  |  |  |  |  |
| [13ZB44-1@01](mailto:13ZB44-1@01) | 528 | 394 | 0.15 | 0.05096 | 2.80143 | 0.02964 | 3.34008 | 0.00422 | 1.81882 | 239 | 63.3 | 29.7 | 1 | 27.1 | 0.5 |
| [13ZB44-1@02](mailto:13ZB44-1@02) | 703 | 625 | 0.03 | 0.09683 | 2.05356 | 0.06458 | 2.72568 | 0.00484 | 1.79227 | 1564 | 38 | 63.5 | 1.7 | 31.1 | 0.6 |
| [13ZB44-1@03](mailto:13ZB44-1@01) | 826 | 668 | 0.14 | 0.05130 | 2.69656 | 0.03162 | 3.28383 | 0.00447 | 1.87406 | 254.5 | 60.8 | 31.6 | 1 | 28.7 | 0.5 |
| [13ZB44-1@04](mailto:13ZB44-1@02) | 1458 | 1200 | 0.25 | 0.04900 | 1.70017 | 0.03004 | 2.35802 | 0.00445 | 1.63391 | 148 | 39.4 | 30 | 0.7 | 28.6 | 0.5 |
| [13ZB44-1@05](mailto:13ZB44-1@01) | 1004 | 1105 | 0.15 | 0.04976 | 1.61993 | 0.03071 | 2.29383 | 0.00448 | 1.62403 | 183.8 | 37.3 | 30.7 | 0.7 | 28.8 | 0.5 |
| [13ZB44-1@06](mailto:13ZB44-1@02) | 966 | 1696 | 0.02 | 0.07482 | 1.76721 | 0.04822 | 2.42380 | 0.00467 | 1.65886 | 1063.7 | 35.1 | 47.8 | 1.1 | 30.1 | 0.5 |
| [13ZB44-1@07](mailto:13ZB44-1@01) | 6007 | 2026 | 1.28 | 0.04736 | 1.26212 | 0.02950 | 2.11179 | 0.00452 | 1.69314 | 67.6 | 29.8 | 29.5 | 0.6 | 29.1 | 0.5 |
| [13ZB44-1@08](mailto:13ZB44-1@02) | 1681 | 997 | 0.05 | 0.09692 | 1.20366 | 0.07715 | 2.16500 | 0.00577 | 1.79957 | 1565.6 | 22.4 | 75.5 | 1.6 | 37.1 | 0.7 |
| [13ZB44-1@09](mailto:13ZB44-1@01) | 426 | 311 | 0.13 | 0.05217 | 4.31177 | 0.03137 | 4.70342 | 0.00436 | 1.87904 | 292.7 | 95.6 | 31.4 | 1.5 | 28.1 | 0.5 |
| [13ZB44-1@10](mailto:13ZB44-1@02) | 567 | 604 | 0.23 | 0.04838 | 2.24686 | 0.03043 | 2.81073 | 0.00456 | 1.68873 | 118 | 52.1 | 30.4 | 0.8 | 29.3 | 0.5 |
| [13ZB44-1@11](mailto:13ZB44-1@01) | 3500 | 1447 | 0.53 | 0.04887 | 1.46423 | 0.03057 | 2.18310 | 0.00454 | 1.61925 | 141.8 | 34 | 30.6 | 0.7 | 29.2 | 0.5 |
| [13ZB44-1@12](mailto:13ZB44-1@02) | 861 | 724 | 0.03 | 0.08906 | 3.60784 | 0.05816 | 4.07801 | 0.00474 | 1.90096 | 1405.5 | 67.6 | 57.4 | 2.3 | 30.5 | 0.6 |
| [13ZB44-1@13](mailto:13ZB44-1@02) | 1101 | 510 | 0.23 | 0.05181 | 2.53166 | 0.03248 | 3.08058 | 0.00455 | 1.75520 | 276.8 | 57 | 32.5 | 1 | 29.2 | 0.5 |

**Table S4.** Summary of argon isotopic data and ages for the trachytes from the Gemuchaka area, central Qiangtang Block

| Incremental heating |  | 36Ar(a) | 37Ar(ca) | 38Ar(cl) | 39Ar(k) | 40Ar(r) | 40Ar(r) (%) | 39Ar(k) (%) | Age (Ma) | ± 2σ |
| --- | --- | --- | --- | --- | --- | --- | --- | --- | --- | --- |
| 13ZB44-1 (Phl) |  |  |  |  |  |  |  |  |  |  |
| 16WHA0305-013 | 4.60% | 0.043328 | 0 | 0.082842 | 48.707179 | 129.050608 | 90.9 | 2.55 | 29.4 | 0.4 |
| 16WHA0305-014 | 5.00% | 0.075514 | 0 | 0.197493 | 91.484099 | 241.710998 | 91.47 | 4.8 | 29.4 | 0.3 |
| 16WHA0305-016 | 5.50% | 0.076241 | 0 | 0.348712 | 127.127433 | 337.15562 | 93.66 | 6.66 | 29.5 | 0.2 |
| 16WHA0305-017 | 6.00% | 0.156747 | 0 | 0.518406 | 181.306868 | 479.462301 | 91.12 | 9.5 | 29.4 | 0.2 |
| 16WHA0305-018 | 6.60% | 0.038851 | 0 | 0.103811 | 55.100565 | 145.31566 | 92.6 | 2.89 | 29.3 | 0.4 |
| 16WHA0305-019 | 7.20% | 0.117495 | 0 | 0.307899 | 121.398633 | 320.330037 | 90.15 | 6.36 | 29.3 | 0.2 |
| 16WHA0305-020 | 8.00% | 0.168991 | 0.535887 | 0.57917 | 204.266418 | 539.048959 | 91.45 | 10.71 | 29.3 | 0.2 |
| 16WHA0305-022 | 9.00% | 0.824263 | 1.179311 | 2.747944 | 820.998844 | 2167.837695 | 89.83 | 43.04 | 29.4 | 0.1 |
| 16WHA0305-023 | 10.00% | 0.136008 | 0 | 0.269399 | 109.388011 | 289.027531 | 87.72 | 5.73 | 29.4 | 0.2 |
| J = 0.00619589 ± 0.00001549, Tp(plateau age) = 29.36 ± 0.16 Ma, Tn(normal isochron age) = 29.47 ± 0.36 Ma, Ti(inverse isochron age) = 29.46 ± 0.36 Ma | | | | | | | | | | |

Note: phl, phologopite.

**Table S5.** Representative electron microprobe analyses of mica in the Cenozoic volcanic rocks from the central Qiangtang Block

| Sample | 13ZB44-4 | trachyte |  |  |  |  |  | 13ZB44-2 | trachyte |  |  |  |  |  |
| --- | --- | --- | --- | --- | --- | --- | --- | --- | --- | --- | --- | --- | --- | --- |
| Mineral | Phl | Phl | Phl | Phl | Phl | Phl | Annite | Phl | Phl | Phl | Phl | Phl | Phl | Phl |
| Spots | 1 | 2 | 3 | 4 | 5 | 6 | 7 | 1 | 2 | 3 | 4 | 5 | 6 | 7 |
| SiO2 | 36.16 | 36.83 | 37.15 | 36.92 | 37.12 | 37.51 | 34.89 | 37.45 | 37.2 | 37.21 | 36.91 | 37.22 | 36.22 | 36.97 |
| TiO2 | 8.76 | 8.44 | 8.74 | 8.18 | 8.26 | 7.69 | 8.02 | 7.8 | 8.37 | 7.64 | 7.97 | 7.87 | 8.17 | 8.53 |
| Al2O3 | 13.09 | 12.75 | 13.15 | 13.18 | 13.15 | 12.99 | 12.46 | 13.04 | 13.09 | 12.95 | 13.09 | 13.31 | 13.32 | 13.12 |
| Fe2O3 |  |  |  |  |  |  |  |  |  |  |  |  |  |  |
| FeO | 11.95 | 11.86 | 10.19 | 11 | 11.11 | 10.16 | 16.07 | 10.46 | 11.08 | 11.35 | 11 | 11.06 | 12.55 | 11.46 |
| MnO | 0.11 | 0.07 | 0.09 | 0.06 | 0.09 | 0.08 | 0.08 | 0.1 | 0.11 | 0.12 | 0.1 | 0.05 | 0.09 | 0.07 |
| MgO | 16.02 | 17 | 17.76 | 17.53 | 17.37 | 18.5 | 15.37 | 17.92 | 17.37 | 17.91 | 17.38 | 17.25 | 15.81 | 16.73 |
| CaO | 0 | 0.15 | 0.11 | 0.04 | 0.03 | 0.02 | 0.06 | 0.02 | 0.11 | 0.04 | 0.05 | 0.07 | 0.03 | 0 |
| Na2O | 0.59 | 0.64 | 0.73 | 0.76 | 0.65 | 0.69 | 0.52 | 0.78 | 0.68 | 0.71 | 0.68 | 0.66 | 0.63 | 0.72 |
| K2O | 8.14 | 8.07 | 8.26 | 8.25 | 8.38 | 8.54 | 7.99 | 8.41 | 8.18 | 8.38 | 8.27 | 8.45 | 8.09 | 8.18 |
| H2O+ |  |  |  |  |  |  |  |  |  |  |  |  |  |  |
| F | 2.25 | 2.39 | 2.25 | 3.02 | 2.24 | 3.03 | 1.68 | 3.6 | 3.4 | 3.22 | 3.14 | 1.84 | 1.34 | 2.7 |
| Cl | 0.03 | 0.05 | 0.06 | 0.04 | 0.06 | 0.05 | 0.06 | 0.06 | 0.08 | 0.04 | 0.06 | 0.05 | 0.06 | 0.04 |
| Total | 96.17 | 97.24 | 97.43 | 97.71 | 97.49 | 97.99 | 96.47 | 98.11 | 98.22 | 98.25 | 97.32 | 97.03 | 95.73 | 97.37 |
| Cations on the basis of 11 oxygens | | |  |  |  |  |  |  |  |  |  |  |  |  |
| Si | 2.618 | 2.631 | 2.629 | 2.609 | 2.638 | 2.634 | 2.581 | 2.622 | 2.609 | 2.619 | 2.617 | 2.661 | 2.649 | 2.628 |
| AlⅣ | 1.117 | 1.074 | 1.096 | 1.097 | 1.102 | 1.075 | 1.087 | 1.076 | 1.082 | 1.075 | 1.094 | 1.121 | 1.148 | 1.099 |
| AlⅥ | 0 | 0 | 0 | 0 | 0 | 0 | 0 | 0 | 0 | 0 | 0 | 0 | 0 | 0 |
| Ti | 0.477 | 0.454 | 0.465 | 0.435 | 0.441 | 0.406 | 0.446 | 0.411 | 0.442 | 0.404 | 0.425 | 0.423 | 0.45 | 0.456 |
| Fe3+ | 0.494 | 0.482 | 0.474 | 0.508 | 0.461 | 0.487 | 0.356 | 0.545 | 0.562 | 0.497 | 0.524 | 0.425 | 0.409 | 0.518 |
| Fe2+ | 0.229 | 0.226 | 0.129 | 0.141 | 0.199 | 0.11 | 0.638 | 0.068 | 0.088 | 0.171 | 0.128 | 0.236 | 0.358 | 0.163 |
| Mn | 0.007 | 0.004 | 0.005 | 0.003 | 0.005 | 0.005 | 0.005 | 0.006 | 0.006 | 0.007 | 0.006 | 0.003 | 0.006 | 0.004 |
| Mg | 1.729 | 1.81 | 1.873 | 1.847 | 1.84 | 1.937 | 1.695 | 1.871 | 1.817 | 1.879 | 1.837 | 1.838 | 1.724 | 1.773 |
| Ca | 0 | 0.012 | 0.008 | 0.003 | 0.002 | 0.002 | 0.005 | 0.001 | 0.008 | 0.003 | 0.004 | 0.006 | 0.003 | 0 |
| Na | 0.083 | 0.089 | 0.1 | 0.104 | 0.089 | 0.094 | 0.075 | 0.106 | 0.092 | 0.096 | 0.094 | 0.091 | 0.089 | 0.099 |
| K | 0.752 | 0.736 | 0.746 | 0.743 | 0.76 | 0.765 | 0.754 | 0.751 | 0.732 | 0.752 | 0.748 | 0.771 | 0.755 | 0.742 |
| Total | 7.506 | 7.518 | 7.526 | 7.492 | 7.539 | 7.513 | 7.644 | 7.455 | 7.438 | 7.503 | 7.476 | 7.575 | 7.591 | 7.482 |
| Mg# | 70 | 72 | 76 | 74 | 74 | 76 | 63 | 75 | 74 | 74 | 74 | 74 | 69 | 72 |

Note: Phl, Phlogopite; Ann, Annite.

**Table S6.** Representative electron microprobe analyses of feldspars of trachytes from the Gemuchaka area, central Qiangtang Block

| Sample | 13ZB44-1 |  |  |  |  |  |  |  |  |  |  | 13ZB44-2 |  |  |  |
| --- | --- | --- | --- | --- | --- | --- | --- | --- | --- | --- | --- | --- | --- | --- | --- |
| Mineral | Sa | And | And | And | And | And | And | And | Sa | And | Sa | And | And | And | And |
| Spot | 1 | 2 | 3 | 4 | 5 | 6 | 7 | 8 | 9 | 10 | 11 | 1 | 2 | 3 | 4 |
| SiO2 | 64.61 | 57.31 | 59.82 | 58.81 | 59.29 | 59.21 | 56.76 | 57.64 | 64.43 | 59.09 | 64.44 | 59.29 | 59.1 | 60.98 | 60.22 |
| TiO2 | 0.15 | 0.05 | - | 0.04 | 0.07 | 0.07 | 0.05 | 0.15 | 0.12 | 0.08 | 0.04 | 0.08 | 0.06 | 0.05 | 0.06 |
| Al2O3 | 19.86 | 26.14 | 25.15 | 24.08 | 23.86 | 24.5 | 25.98 | 25.55 | 20.32 | 24.57 | 20.44 | 25.17 | 25.54 | 24.4 | 24.83 |
| FeO | 0.31 | 0.49 | 0.39 | 0.43 | 0.39 | 0.44 | 0.49 | 0.52 | 0.41 | 0.47 | 0.34 | 0.44 | 0.44 | 0.43 | 0.45 |
| MnO | 0.02 | - | 0.01 | 0.01 | - | - | 0.01 | - | 0.01 | - | 0.02 | 0 | 0 | 0 | 0 |
| MgO | - | 0.03 | 0.02 | 0.02 | 0 | 0.03 | 0.04 | 0.02 | - | 0.02 | - | 0.05 | 0.03 | 0.03 | 0.03 |
| CaO | 1.29 | 8.41 | 6.91 | 6.68 | 6.18 | 6.74 | 8.47 | 8.01 | 1.76 | 6.58 | 1.62 | 7.49 | 7.44 | 6.27 | 6.3 |
| Na2O | 6.29 | 6.19 | 6.66 | 6.89 | 6.55 | 7.04 | 6.26 | 6.63 | 6.31 | 7.29 | 5.74 | 6.19 | 6.2 | 6.75 | 6.53 |
| K2O | 7.03 | 0.78 | 1.51 | 1.34 | 2.33 | 1.43 | 1.05 | 1.1 | 6.32 | 1.52 | 6.17 | 1.03 | 1.1 | 1.33 | 1.28 |
| Total | 99.6 | 99.46 | 100.52 | 98.36 | 98.74 | 99.46 | 99.18 | 99.68 | 99.78 | 99.64 | 98.94 | 99.74 | 99.91 | 100.26 | 99.69 |
| Cations calculated on the basis of 8 oxygens | | | |  |  |  |  |  |  |  |  |  |  |  |  |
| Si | 2.932 | 2.6 | 2.675 | 2.69 | 2.707 | 2.681 | 2.591 | 2.617 | 2.915 | 2.675 | 2.925 | 2.66 | 2.648 | 2.715 | 2.696 |
| Al | 1.062 | 1.398 | 1.325 | 1.298 | 1.284 | 1.307 | 1.398 | 1.368 | 1.084 | 1.311 | 1.093 | 1.331 | 1.349 | 1.28 | 1.31 |
| Ca | 0.063 | 0.409 | 0.331 | 0.328 | 0.302 | 0.327 | 0.414 | 0.39 | 0.086 | 0.319 | 0.079 | 0.36 | 0.357 | 0.299 | 0.302 |
| Na | 0.553 | 0.544 | 0.577 | 0.611 | 0.58 | 0.618 | 0.554 | 0.584 | 0.553 | 0.64 | 0.505 | 0.538 | 0.538 | 0.583 | 0.567 |
| K | 0.407 | 0.045 | 0.086 | 0.078 | 0.136 | 0.083 | 0.061 | 0.064 | 0.365 | 0.088 | 0.357 | 0.059 | 0.063 | 0.075 | 0.073 |
| An | 6.2 | 41 | 33.3 | 32.2 | 29.7 | 31.8 | 40.2 | 37.6 | 8.5 | 30.5 | 8.4 | 37.6 | 37.3 | 31.2 | 32.1 |
| Ab | 54.1 | 54.5 | 58 | 60.1 | 57 | 60.1 | 53.8 | 56.3 | 55.1 | 61.1 | 53.7 | 56.2 | 56.2 | 60.9 | 60.2 |
| Or | 39.8 | 4.5 | 8.7 | 7.7 | 13.4 | 8.1 | 5.9 | 6.2 | 36.4 | 8.4 | 38 | 6.2 | 6.5 | 7.9 | 7.8 |

**Table S6.** (Continued)

| Sample | 13ZB44-2 |  |  |  | 13ZB44-4 |  |  |  |  |  |  |  |  |  |
| --- | --- | --- | --- | --- | --- | --- | --- | --- | --- | --- | --- | --- | --- | --- |
| Mineral | Sa | And | And | And | Sa | And | And | And | And | And | And | Sa | And | And |
| Spot | 5 | 6 | 7 | 8 | 1 | 2 | 3 | 4 | 5 | 6 | 7 | 8 | 9 | 10 |
| SiO2 | 66.1 | 60.87 | 51.19 | 60.86 | 67.02 | 59.26 | 59.77 | 59.72 | 59.68 | 61.55 | 60.67 | 65.1 | 58.85 | 61.16 |
| TiO2 | 0.09 | 0.06 | 0.05 | 0.06 | 0.1 | 0.09 | 0.08 | 0.07 | 0.07 | 0.08 | 0.03 | 0.3 | 0.05 | 0.05 |
| Al2O3 | 20.16 | 25.01 | 24.66 | 24.56 | 19.16 | 25.31 | 25.38 | 25.36 | 25.57 | 23.34 | 24.43 | 19.49 | 24.25 | 24.11 |
| FeO | 0.3 | 0.44 | 0.42 | 0.43 | 0.38 | 0.37 | 0.36 | 0.38 | 0.35 | 0.34 | 0.43 | 1.28 | 0.43 | 0.4 |
| MnO | 0 | 0 | 0 | 0.01 | 0 | 0.01 | 0.01 | 0.01 | 0 | 0.01 | 0.01 | 0 | 0.02 | 0.01 |
| MgO | 0 | 0.02 | 0.04 | 0.02 | 0 | 0.03 | 0.02 | 0.01 | 0.01 | 0 | 0.06 | 0.01 | 0.04 | 0.03 |
| CaO | 1.45 | 6.69 | 6.16 | 5.92 | 1.2 | 6.91 | 6.95 | 6.6 | 6.93 | 4.9 | 5.75 | 1.31 | 6.58 | 5.61 |
| Na2O | 5.96 | 6.57 | 6.69 | 6.88 | 6.13 | 6.13 | 6.22 | 6.17 | 6.13 | 6.12 | 6.18 | 5.67 | 6.05 | 6.44 |
| K2O | 6.65 | 1.07 | 1.57 | 1.41 | 6.46 | 1.51 | 1.4 | 1.76 | 1.54 | 3.2 | 1.82 | 7.13 | 1.42 | 2.09 |
| Total | 100.7 | 100.74 | 100.78 | 100.15 | 100.46 | 99.62 | 100.17 | 100.08 | 100.28 | 99.53 | 99.38 | 100.28 | 97.68 | 99.9 |
| Cations calculated on the basis of 8 oxygens | | | |  |  |  |  |  |  |  |  |  |  |  |
| Si | 2.941 | 2.695 | 2.551 | 2.712 | 2.983 | 2.662 | 2.668 | 2.671 | 2.662 | 2.766 | 2.721 | 2.932 | 2.692 | 2.733 |
| Al | 1.057 | 1.305 | 1.448 | 1.29 | 1.005 | 1.34 | 1.335 | 1.337 | 1.345 | 1.237 | 1.292 | 1.035 | 1.307 | 1.27 |
| Ca | 0.069 | 0.317 | 0.329 | 0.283 | 0.057 | 0.333 | 0.332 | 0.316 | 0.331 | 0.236 | 0.277 | 0.063 | 0.323 | 0.269 |
| Na | 0.514 | 0.564 | 0.646 | 0.595 | 0.529 | 0.534 | 0.538 | 0.535 | 0.53 | 0.533 | 0.537 | 0.495 | 0.536 | 0.558 |
| K | 0.377 | 0.061 | 0.1 | 0.08 | 0.367 | 0.086 | 0.08 | 0.1 | 0.087 | 0.183 | 0.104 | 0.41 | 0.083 | 0.119 |
| An | 7.2 | 33.7 | 30.6 | 29.5 | 6 | 34.9 | 35 | 33.2 | 34.9 | 24.8 | 30.1 | 6.5 | 34.3 | 28.4 |
| Ab | 53.5 | 59.9 | 60.1 | 62.1 | 55.5 | 56 | 56.6 | 56.2 | 55.9 | 56 | 58.5 | 51.2 | 56.9 | 59 |
| Or | 39.3 | 6.4 | 9.3 | 8.4 | 38.5 | 9.1 | 8.4 | 10.5 | 9.2 | 19.3 | 11.4 | 42.3 | 8.8 | 12.6 |

Note: Sa, sanidine; Ano, anorthoclase; And, andesite.

**Table S7.** Major (wt. %) and trace (ppm) elements for the trachytes from the Gemuchaka area, central Qiangtang Block

| Locality | S Daxiong lake | S Daxiong lake | S Daxiong lake | S Daxiong lake |
| --- | --- | --- | --- | --- |
| Sample | 13ZB44-1 | 13ZB44-2 | 13ZB44-3 | 13ZB44-4 |
| Longitude | E85°37′50″ | E85°37′50″ | E85°37′50″ | E85°37′50″ |
| Latitude | N33°54′03″ | N33°54′03″ | N33°54′03″ | N33°54′03″ |
| Classification | trachyte | trachyte | trachyte | trachyte |
| SiO2 | 62.65 | 62.93 | 62.41 | 62.77 |
| TiO2 | 1.05 | 1.01 | 1.05 | 1.05 |
| Al2O3 | 17.23 | 17.37 | 17.3 | 17.39 |
| Fe2O3T | 3.86 | 3.86 | 4.31 | 4.21 |
| MnO | 0.04 | 0.04 | 0.03 | 0.03 |
| MgO | 0.56 | 0.53 | 0.47 | 0.46 |
| CaO | 2.02 | 1.91 | 1.87 | 1.9 |
| Na2O | 4.66 | 4.63 | 4.61 | 4.66 |
| K2O | 5.99 | 5.98 | 6 | 6.12 |
| P2O5 | 0.29 | 0.29 | 0.3 | 0.3 |
| L.O.I | 0.9 | 0.72 | 0.91 | 0.74 |
| Total | 99.64 | 99.65 | 99.64 | 99.64 |
| Mg# | 22 | 21 | 18 | 18 |
| K2O/Na2O | 1.3 | 1.3 | 1.3 | 1.3 |
| Quartz (Q) | 8.3 | 9 | 8.8 | 8.3 |
| Nepheline(Ne) |  |  |  |  |
| Sc | 3.26 | 3.29 | 3.01 | 2.76 |
| V | 39.7 | 41.1 | 37.5 | 33.1 |
| Cr | 53 | 86 | 66 | 53 |
| Co | 4.34 | 4.61 | 4.22 | 4.05 |
| Ni | 5.9 | 8 | 7.4 | 6 |
| Cu | 9.5 | 12 | 10.9 | 9.4 |
| Zn | 83 | 97 | 59 | 62 |
| Ga | 26.5 | 26.7 | 27 | 27.1 |
| Ge | 2 | 2.12 | 2.37 | 2.25 |
| Rb | 202 | 202 | 203 | 205 |
| Sr | 1310 | 1358 | 1336 | 1338 |
| Y | 18.19 | 21.85 | 21.47 | 18.91 |
| Zr | 687 | 670 | 641 | 653 |
| Nb | 52 | 50.3 | 52.5 | 52.2 |
| Cs | 3.28 | 3.13 | 3.11 | 2.73 |
| Ba | 1925 | 1855 | 1863 | 1896 |
| La | 139.2 | 150.5 | 167.3 | 161.5 |
| Ce | 256.8 | 273.4 | 300.4 | 292.4 |
| Pr | 27.52 | 29.36 | 32.04 | 31.15 |
| Nd | 90.21 | 99.47 | 107.6 | 104.5 |
| Sm | 12.01 | 12.95 | 14.03 | 13.65 |
| Eu | 3.13 | 3.18 | 3.23 | 3.23 |
| Gd | 8.23 | 9.29 | 9.97 | 9.86 |
| Tb | 0.9 | 1.01 | 1.09 | 1.02 |
| Dy | 4.25 | 4.91 | 5.17 | 4.87 |
| Ho | 0.74 | 0.85 | 0.88 | 0.82 |
| Er | 1.83 | 2.06 | 2.04 | 1.89 |
| Tm | 0.26 | 0.28 | 0.26 | 0.25 |
| Yb | 1.59 | 1.73 | 1.53 | 1.48 |
| Lu | 0.24 | 0.25 | 0.21 | 0.21 |
| Hf | 14.93 | 14.51 | 14.2 | 13.51 |
| Ta | 2.63 | 2.58 | 2.64 | 2.68 |
| Pb | 46.2 | 53.1 | 57.8 | 54.9 |
| Th | 57.4 | 56.9 | 58.8 | 59.3 |
| U | 4.2 | 3.13 | 3.32 | 3.91 |
| δEu | 0.92 | 0.85 | 0.8 | 0.82 |
| TZrn (°C) | 901 | 902 | 897 | 897 |

Note: L.O.I: Loss on Ignition; Fe2O3T = Total Fe2O3 content; Mg# = 100 × Mg2+ / (Mg2+ + Fe2+)mole; δEu = EuN / (SmN × GdN)1/2; TZrn (°C), temperature based on bulk-rock geochemical compositions (Watson and Harrison, 1983). Quartz (Q) and Nepheline (Ne) are the result of normative mineral calculation.

**Table S8.** Sr–Nd isotopic compositions for the trachytes and other K-rich volcanic rocks from the Gemuchaka area, central Qiangtang block

| Locality | Sample | Age(Ma) | 87Rb/86Sr | 87Sr/86Sr | 2σ | (87Sr/86Sr) i | 147Sm/144Nd | 143Nd/144Nd | 2σ | εNd(t) | TDM(Ga) | TDM2(Ga) |
| --- | --- | --- | --- | --- | --- | --- | --- | --- | --- | --- | --- | --- |
| S Daxiong lake | 13ZB44-1* | 29.3 | 0.4464 | 0.707862 | 0.000007 | 0.707672 | 0.0805 | 0.512377 | 0.000005 | -4.6 | 0.89 | 1.23 |
| S Daxiong lake | 13ZB44-2* |  | 0.4305 | 0.707827 | 0.000009 | 0.707644 | 0.0787 | 0.512335 | 0.000004 | -5.5 | 0.92 | 1.30 |
| SW Daxiong lake | 13ZB36-1II |  | 0.1228 | 0.708122 | 0.000008 | 0.708070 | 0.0861 | 0.512335 | 0.000005 | -5.5 | 0.97 | 1.30 |
| SW Daxiong lake | 13ZB36-2II | 29.6 | 0.1752 | 0.708151 | 0.000007 | 0.708076 | 0.0845 | 0.512329 | 0.000005 | -5.6 | 0.97 | 1.31 |
| SW Daxiong lake | 13ZB36-3II |  | 0.1196 | 0.708094 | 0.000007 | 0.708043 | 0.0863 | 0.512337 | 0.000005 | -5.4 | 0.97 | 1.29 |
| SW Daxiong lake | 13ZB37-1II |  | 0.2716 | 0.708117 | 0.000007 | 0.708001 | 0.0812 | 0.512341 | 0.000004 | -5.3 | 0.93 | 1.29 |
| SW Daxiong lake | 13ZB38-2II |  | 0.111 | 0.707841 | 0.000007 | 0.707794 | 0.0869 | 0.512358 | 0.000004 | -5 | 0.95 | 1.26 |
| SW Daxiong lake | 13ZB39-1II |  | 0.1168 | 0.707875 | 0.000007 | 0.707825 | 0.0856 | 0.512355 | 0.000004 | -5.1 | 0.95 | 1.27 |
| SW Daxiong lake | 13ZB40-2II | 29.0 | 0.2826 | 0.708117 | 0.000006 | 0.707997 | 0.0826 | 0.512324 | 0.000005 | -5.7 | 0.96 | 1.31 |
| SW Daxiong lake | 13ZB40-3II |  | 0.2515 | 0.70814 | 0.000007 | 0.708033 | 0.0826 | 0.512327 | 0.000004 | -5.6 | 0.96 | 1.31 |
| SW Daxiong lake | 13ZB41-2II |  | 0.0711 | 0.707829 | 0.000008 | 0.707799 | 0.0861 | 0.512362 | 0.000005 | -5 | 0.94 | 1.26 |
| SW Daxiong lake | 13ZB41-3II | 29.4 | 0.0855 | 0.707838 | 0.000006 | 0.707802 | 0.0879 | 0.512369 | 0.000006 | -4.8 | 0.95 | 1.24 |
| SW Daxiong lake | 13ZB41-5II |  | 0.2448 | 0.708379 | 0.000007 | 0.708275 | 0.0807 | 0.512334 | 0.000004 | -5.5 | 0.94 | 1.30 |
| SW Daxiong lake | 13ZB42-1II |  | 0.0974 | 0.707803 | 0.000006 | 0.707762 | 0.0869 | 0.512351 | 0.000005 | -5.2 | 0.96 | 1.27 |
| SW Daxiong lake | 13ZB43-2II |  | 0.09 | 0.707824 | 0.000008 | 0.707786 | 0.0865 | 0.512356 | 0.000004 | -5.1 | 0.95 | 1.26 |
| W Mt Shuangjian | 13ZB45-1II |  | 0.3415 | 0.708055 | 0.000007 | 0.707909 | 0.086 | 0.512336 | 0.000004 | -5.5 | 0.97 | 1.30 |
| W Mt Shuangjian | 13ZB45-3II |  | 0.3173 | 0.708035 | 0.000008 | 0.707900 | 0.0857 | 0.512308 | 0.000005 | -6 | 1.01 | 1.34 |
| W Mt Shuangjian | 13ZB45-5II |  | 0.2957 | 0.708087 | 0.000007 | 0.707961 | 0.0861 | 0.512326 | 0.000005 | -5.7 | 0.99 | 1.31 |
| W Mt Shuangjian | 13ZB46-1II |  | 0.6341 | 0.70831 | 0.000007 | 0.708040 | 0.0882 | 0.512354 | 0.000006 | -5.1 | 0.97 | 1.27 |
| W Mt Shuangjian | 13ZB46-3II |  | 0.6441 | 0.708322 | 0.000007 | 0.708048 | 0.0872 | 0.512341 | 0.000005 | -5.4 | 0.98 | 1.29 |
| Mt Shuangjian | 13ZB47-1II |  | 0.0487 | 0.707826 | 0.000007 | 0.707805 | 0.0849 | 0.512351 | 0.000007 | -5.2 | 0.95 | 1.27 |
| Mt Shuangjian | 13ZB47-4II |  | 0.2531 | 0.708442 | 0.000007 | 0.708334 | 0.0802 | 0.512355 | 0.000011 | -5.1 | 0.91 | 1.26 |
| Mt Shuangjian | 13ZB47-6II |  | 0.0504 | 0.707866 | 0.000006 | 0.707845 | 0.0861 | 0.512364 | 0.000004 | -4.9 | 0.94 | 1.25 |

Note: (87Sr/86Sr)i = (87Sr/86Sr)S – (87Rb/86Sr)S × (eλt – 1); 87Rb/86Sr = (Rb/Sr) × 2.8956; λRb-Sr = 0.0142 Ga-1;

(143Nd/144Nd)i = (143Nd/144Nd)S – (147Sm/144Nd)S × (eλT – 1); 147Sm/144Nd = (Sm/Nd) × 0.60456; λSm-Nd = 0.00654 Ga-1;

εNd(t) = [(143Nd/144Nd)S(t) / ( 143Nd/144Nd)CHUR(t) – 1] × 104 ; (143Nd/144Nd)CHUR(t) = 0.512638 – 0.1967 × (eλt – 1);

TDM (Ga) = 1/λ × ln{1 + [((143Nd/144Nd)S – 0.51315) / ((147Sm/144Nd)S – 0.2137)]}. TDM2= ln{[ εNd(t) – εDMNd(t)]/[(fC–fDM)] + eλt}/λ

Asterisks (*) and subscript (II) refer to the data of trachytes in this study and coeval K-rich volcanic rocks from Ou *et al.* (2018), respectively.

**Table S9.** Zircon Hf-O isotopic data for the trachytes from the Gemuchaka area, central Qiangtang Block

| **Sample** | **Spots** | **176Yb/177Hf** | **176Lu/177Hf** | **176Hf/177Hf** | **2σ** | **176Hf/177Hfi** | **εHf(0)** | **εHf(t)** | **2σ** | **TDM (Ma)** | **TDMC (Ma)** | **fLu/Hf** | **t (Ma)** | **δ18O(‰)** | **1SE** |
| --- | --- | --- | --- | --- | --- | --- | --- | --- | --- | --- | --- | --- | --- | --- | --- |
| 13ZB44-1 | 1 | 0.016378 | 0.000664 | 0.282658 | 0.000025 | 0.282658 | -4.04 | -3.39 | 0.87 | 835 | 1322 | -0.98 | 30 | 8.06 | 0.1 |
| trachyte | 2 | 0.023928 | 0.000926 | 0.281648 | 0.000024 | 0.281620 | -40.73 | -6.00 | 0.84 | 2245 | 2682 | -0.97 | 1564 |  |  |
|  | 3 | 0.012784 | 0.000477 | 0.282734 | 0.000026 | 0.282734 | -1.35 | -0.73 | 0.93 | 724 | 1153 | -0.99 | 28 |  |  |
|  | 4 | 0.155055 | 0.005486 | 0.282783 | 0.000031 | 0.282779 | 0.26 | 0.92 | 1.08 | 756 | 1049 | -0.83 | 30 | 6.51 | 0.07 |
|  | 5 | 0.01844 | 0.000648 | 0.282683 | 0.000025 | 0.282683 | -3.16 | -2.52 | 0.90 | 799 | 1267 | -0.98 | 29 |  |  |
|  | 6 | 0.062197 | 0.002061 | 0.282623 | 0.000030 | 0.282621 | -5.32 | -4.70 | 1.07 | 918 | 1404 | -0.94 | 28.4 | 7.74 | 0.06 |
|  | 7 | 0.017436 | 0.000633 | 0.282648 | 0.000023 | 0.282648 | -4.40 | -3.78 | 0.82 | 848 | 1346 | -0.98 | 28.2 |  |  |
|  | 8 | 0.037463 | 0.001272 | 0.282651 | 0.000026 | 0.282628 | -5.08 | 16.07 | 0.91 | 858 | 798 | -0.96 | 956 | 7.53 | 0.07 |
|  | 10 | 0.015221 | 0.000540 | 0.282701 | 0.000025 | 0.282699 | -2.57 | 1.73 | 0.90 | 771 | 1127 | -0.98 | 196 |  |  |
|  | 11 | 0.020716 | 0.000904 | 0.282676 | 0.000024 | 0.282659 | -4.00 | 18.32 | 0.84 | 815 | 692 | -0.97 | 1008 | 7.82 | 0.07 |
|  | 13 | 0.018022 | 0.000758 | 0.282628 | 0.000026 | 0.282628 | -5.10 | -4.47 | 0.92 | 878 | 1390 | -0.98 | 28.8 | 7.45 | 0.09 |
|  | 14 | 0.020465 | 0.000925 | 0.282590 | 0.000028 | 0.282590 | -6.44 | -5.78 | 0.99 | 936 | 1474 | -0.97 | 30 | 8.12 | 0.09 |
|  | 15 | 0.018428 | 0.000705 | 0.282628 | 0.000030 | 0.282627 | -5.12 | -4.46 | 1.05 | 878 | 1390 | -0.98 | 30 |  |  |
|  | 16 | 0.024113 | 0.000952 | 0.282677 | 0.000030 | 0.282676 | -3.39 | -2.74 | 1.06 | 815 | 1281 | -0.97 | 29.4 | 8.14 | 0.07 |
|  | 17 | 0.019289 | 0.000710 | 0.282654 | 0.000021 | 0.282653 | -4.20 | -3.54 | 0.75 | 842 | 1332 | -0.98 | 30 | 8.54 | 0.08 |
|  | 18 | 0.025915 | 0.001019 | 0.282697 | 0.000021 | 0.282696 | -2.68 | -2.02 | 0.75 | 788 | 1236 | -0.97 | 30 |  |  |
|  | 19 | 0.013973 | 0.000534 | 0.282682 | 0.000032 | 0.282681 | -3.21 | -2.58 | 1.13 | 799 | 1270 | -0.98 | 28.6 | 7.44 | 0.12 |
|  | 20 | 0.015999 | 0.000652 | 0.282660 | 0.000024 | 0.282659 | -3.99 | -3.36 | 0.85 | 832 | 1320 | -0.98 | 28.6 | 7.91 | 0.08 |
|  | 21 | 0.015563 | 0.000683 | 0.282661 | 0.000031 | 0.282660 | -3.95 | -3.32 | 1.11 | 831 | 1317 | -0.98 | 28.6 |  |  |

*Note:* εHf(T) = [176Hf/177HfZ / 176Hf/177HfCHUR(t)-1] × 10,000; 176Hf/177HfCHUR(T) = 176Hf/177HfCHUR(0) - 176Lu/177HfCHUR × (eλT - 1)

TDM = (1 / λ) × ln[1+(176Hf/177HfDM - 176Hf/177HfZ)/(176Lu/177HfDM - 176Lu/177HfZ)]; TDMC = TDM - (TDM - T) × [(fCC- fZ) / (fCC- fDM)]; fLu/Hf = 176Hf/177HfZ / 176Lu/177HfCHUR-1,

where fCC, fZircon and fDM are the fLu/Hf values of the continental crust, zircon sample and the depleted mantle; subscript Z = analyzed zircon sample, CHUR = chondritic uniform reservoir; DM = depleted mantle; T = Zircon U-Pb age of sample; λ = 1.867×10-11 year-1, decay constant of 176Lu (*Söderlund et al.,* 2004); 176Hf/177HfDM = 0.28325; 176Lu/177HfDM = 0.0384; present-day 176Hf/177HfCHUR(0) = 0.282772; 176Hf/177HfCHUR = 0.0332; 176Hf/177HfCC= 0.015.

**Supplementary Document 1:** trace element modeling

**Non-modal batch melting model: La/Yb vs. La (ppm)**

The detailed calculation procedures are explained above. In La/Yb vs La (ppm) non-modal batch melting model, we use starting materials 13ZB43–2 (basaltic trachyandesite) and 13ZB36–1 (tephrite), respectively. The related parameters and results of this modeling are listed in Tables A and B.

Table A: Modal proportions of minerals in the newly formed source region and their partition coefficients.

| Mineral | Modal（%） | La | Yb | Pi |
| --- | --- | --- | --- | --- |
| Clinopyroxene | 0.5 | 0.69 | 1.4 | 0.30 |
| Amphibole | 0.193 | 0.85 | 0.88 | 0.34 |
| Olivine | 0.1 | 0.4 | 0.35 | 0 |
| Sanidine | 0.1 | 0.052 | 0.028 | 0.10 |
| Garnet | 0.08 | 0.001 | 7.237 | 0.20 |
| Apatite | 0.016 | 21.7 | 12.3 | 0.01 |
| Phlogopite | 0.011 | 0.007 | 0.0484 | 0.05 |
| D |  | 0.90 | 1.68 |  |
| P |  | 0.50 | 2.17 |  |

Note: D, bulk partition coefficient; Pi is the proportion of phase i entering the melt and P = ∑PiDi, where Di is its crystal-liquid partition coefficient. Data source: GERM (Geochemical Earth Reference Model) home page, http://www.earthref.org/.

Table B: Results of the non-modal batch melting model

| Degree of melting (F) |  | La/Yb | La (ppm) |  | La/Yb | La (ppm) |
| --- | --- | --- | --- | --- | --- | --- |
|  | starting samples 13ZB36-1 | 82.25 | 200.20 | starting samples 13ZB43-2 | 71.08 | 160.50 |
| 5% |  | 144.83 | 217.24 |  | 129.85 | 178.02 |
| 10% |  | 135.90 | 211.46 |  | 126.44 | 177.00 |
| 15% |  | 127.43 | 205.98 |  | 123.07 | 176.00 |
| 20% |  | 119.39 | 200.78 |  | 119.74 | 175.00 |
| 25% |  | 111.75 | 195.84 |  | 116.44 | 174.02 |
| 30% |  | 104.47 | 191.13 |  | 113.18 | 173.05 |
| 35% |  | 97.54 | 186.65 |  | 109.95 | 172.09 |

Note: For non-modal batch partial melting, the equation CL/Co = 1/(F + D - FP) (*Shaw,* 1970) was used. CL is the concentration of a trace element in the melt. Co is the content of a trace element in the newly formed crustal source, which is represented by13ZB43–2 (basaltic trachyandesite, weakly alkaline series) and 13ZB36–1 (tephrite, strongly alkaline series), respectively. D is the bulk distribution coefficient. D = ∑XiDi, where Xi is the weight fraction of phase i in the mineral assemblage and Di is its crystal-liquid partition coefficient. P=∑PiDi, where Pi is the proportion of phase i entering the melt. On the basis of the interpretation of the relative proportions of the mineral phases entering the melt during non-modal batch partial melting, we assumed P = 0.30Dclinopyroxene + 0.34Damphibole + 0.1Dsanidine + 0.2Dgarnet + 0.01Dapatite + 0.05Dphlogopite. F is the degree of partial melting.

**Refference**

Ferry, J., and Watson, E., 2007, New thermodynamic models and revised calibrations for the Ti–in–zircon and Zr–in–rutile thermometers: Contributions to Mineralogy and Petrology, v. 154, p. 429–437. doi:10.1007/s00410-007-0201-0

Söderlund, U., Patchett, P.J., Vervoort, J.D., and Isachsen, C.E., 2004, The decay constant of 176Lu determined from Lu-Hf and U-Pb isotope systematics of terrestrial Precambrian high-temperature mafic intrusions: Meteoritics & Planetary Science, v. 38.

Shaw, D.M., 1970, Trace element fractionation during anatexis: Geochimica et Cosmochimica Acta, v. 34, p. 237-243. doi:10.1016/0016-7037(70)90009-8

1. * Corresponding authors: Qiang Wang, Hai-Xiang Zhang, State Key Laboratory of Isotope Geochemistry, Guangzhou Institute of Geochemistry, Chinese Academy of Sciences, Guangzhou 510640, PR China.

   *E-mail address: wqiang@gig.ac.cn* (*Q. Wang*), [*zhanghx@gig.ac.cn*](mailto:zhanghx@gig.ac.cn) *(H.-X., Zhang)* [↑](#footnote-ref-2)
